# Supplementary material for: Azole Resistance Mechanisms in Pathogenic Malassezia furfur
Source: PubMed Central journal article supplement (PMC8092866; doi:10.1128/aac.01975-20), 2021-04-19
Supplement: AAC.01975-20-s0001.pdf [file AAC.01975-20-s0001.pdf]

# Supplementary Material

## Azole resistance mechanisms in pathogenic *M. furfur*

*Cheryl Leong*<sup>1</sup>, *Joel Chan Wai Kit*<sup>1</sup>, *Shi Mun Lee*<sup>1</sup>, *Yuen In Lam*<sup>1</sup>, *Joleen P.Z. Goh*<sup>1</sup>,  
*Giuseppe Ianir*<sup>2</sup>, and *Thomas L. Dawson, Jr*<sup>1,3#</sup>

<sup>1</sup>Skin Research Institute of Singapore, Agency for Science, Technology and Research (A\*STAR), Singapore, Singapore,

<sup>2</sup>Department of Agricultural, Environmental and Food Sciences, University of Molise, 86100, Campobasso, Italy

<sup>3</sup>Center for Cell Death, Injury & Regeneration, Departments of Drug Discovery & Biomedical Sciences and Biochemistry & Molecular Biology, Medical University of South Carolina, Charleston, SC

#Address correspondence to:

Thomas Dawson

Skin Research Institute of Singapore

11 Mandalay Road, #17-01,

Singapore 308232

### **Supplementary Figures**

Supplementary Figure 1. Conserved motifs in *M. furfur* CYP51

Supplementary Figure 2. Y67F mutation at nucleotide level

Supplementary Figure 3. Validation of *PDR10* gene KO

### **Supplementary Tables**

Supplementary Table 1. MIC values for 26 *M. furfur* isolates

Supplementary Table 2. Top 20 upregulated genes in comparison of untreated CBS 7982, CBS 7019 and CBS 14141- Excel sheet

Supplementary Table 3. MIC values for CBS 7982 over six weeks

Supplementary Table 4. Genes upregulated after clotrimazole treatment – Excel sheet

Supplementary Table 5. Transporter genes upregulated after clotrimazole treatment - Excel sheet

Supplementary Table 6. Primer sequences

**Supplementary Figure 1:**

**Conserved regions of *CYP51A1* *M. globosa* (reference sequence) versus *M. furfur***

Key conserved *CYP51* gene regions identified in *M. globosa*<sup>1</sup>

- Putative heme-binding site (<sup>471</sup>FGAGRHCIG<sup>480</sup>)
- EXXR motif (<sup>365</sup>ERLR<sup>368</sup>)
- Conserved threonine of I-helix involved in proton delivery (<sup>307</sup>T)

|                                   |                                                               |     |
|-----------------------------------|---------------------------------------------------------------|-----|
|                                   | <b>307T</b>                                                   |     |
| <b>CBS 7966 <i>M. globosa</i></b> | LMAGQHTSSATGSWAMLRLASRPEIIIEELYEEQKRVYSDGTGGFAPLDYDIQKSSVPVLD | 360 |
| CBS 1878_scaffold345              | LMAGQHTSSATGSWAMLRLASRPKFIQMLYEEQVRVYGE PDGTFKPLNYDTQKSSVPVLD | 300 |
| CBS 7982                          | LMAGQHTSSATGSWAMLRLASRPKFIQMLYEEQVRVYGE PDGTFKPLNYDTQKSSVPVLD | 300 |
| CBS 1878_scaffold589              | LMAGQHTSSATGSWAMLRLASRPKFIQMLYEEQVRVYGE PDGTFKPLNYDTQKSSVPVLD | 300 |
| CBS 4172                          | LMAGQHTSSATGSWAMLRLASRPKFIQMLYEEQVRVYGE PDGTFKPLNYDTQKSSVPVLD | 300 |
| CBS 7110                          | LMAGQHTSSATGSWAMLRLASRPKFIQMLYEEQVRVYGE PDGTFKPLNYDTQKSSVPVLD | 300 |
| CBS 14141                         | LMAGQHTSSATGSWAMLRLASRPKFIQMLYEEQVRVYGE PDGTFKPLNYDTQKSSVPVLD | 300 |
|                                   | *****:*: *****: * * **:* *****                                |     |
|                                   | <b>365EXXR<sup>368</sup> motif</b>                            |     |
| <b>CBS 7966 <i>M. globosa</i></b> | AVIFETLR LHPPHHSIMRKVKSDIPVPPTLAAPISS--KGRDETYVIPKGHYVIAAPGV  | 418 |
| CBS 1878_scaffold345              | AVIFETLR LHPPHHSIMRKVKSDIPVPPTLAVPRGTVPKEGENAPYIIPKGHYVMAAPGV | 360 |
| CBS 7982                          | AVIFETLR LHPPHHSIMRKVKSDIPVPPTLAVPRGTVPKEGENAPYIIPKGHYVMAAPGV | 360 |
| CBS 1878_scaffold589              | AVIFETLR LHPPHHSIMRKVKSDIPVPPTLAVPRGTVPKEGENAPYIIPKGHYVMAAPGV | 360 |
| CBS 4172                          | AVIFETLR LHPPHHSIMRKVKSDIPVPPTLAVPRGTVPKEGENAPYIIPKGHYVMAAPGV | 360 |
| CBS 7110                          | AVIFETLR LHPPHHSIMRKVKSDIPVPPTLAVPRGTVPKEGENAPYIIPKGHYVMAAPGV | 360 |
| CBS 14141                         | AVIFETLR LHPPHHSIMRKVKSDIPVPPTLAVPRGTVPKEGENAPYIIPKGHYVMAAPGV | 360 |
|                                   | *****:*****.*.: * ..: *:*****.*****                           |     |
|                                   | <b>417FGAGRHCIG<sup>480</sup> motif</b>                       |     |
| <b>CBS 7966 <i>M. globosa</i></b> | SQVDPKIWEDASRFDPHRWLGDKAMVMNQTDDAQEDFGWGMVSTGANSPLYLFFGAGRHC  | 478 |
| CBS 1878_scaffold345              | TQVDPALWDDANEFPNGRWLDNSSNHLTQDTSEQVDYGWGMVSTGGASPLYLFFGAGRHC  | 420 |
| CBS 7982                          | TQVDPALWDDANEFPNGRWLDNSSNHLTQDTSEQVDYGWGMVSTGGASPLYLFFGAGRHC  | 420 |
| CBS 1878_scaffold589              | TQVDPALWDDATEFNPGRWLDNSSNHLTQDMSEQVDYGWGMVSTGGASPLYLFFGAGRHC  | 420 |
| CBS 4172                          | TQVDPALWDDATEFNPGRWLDNSSNHLTQDMSEQVDYGWGMVSTGGASPLYLFFGAGRHC  | 420 |
| CBS 7110                          | TQVDPALWDDATEFNPGRWLDNSSNHLTQDMSEQVDYGWGMVSTGGASPLYLFFGAGRHC  | 420 |
| CBS 14141                         | TQVDPALWDDATEFNPGRWLDNSSNHLTQDMSEQVDYGWGMVSTGGASPLYLFFGAGRHC  | 420 |
|                                   | :**** :*:..*: * ..: * ..: *:*****.*****                       |     |

## Supplementary Figure 2.

Y67F mutation at nucleotide level: Strains with A to T mutation are highlighted in yellow

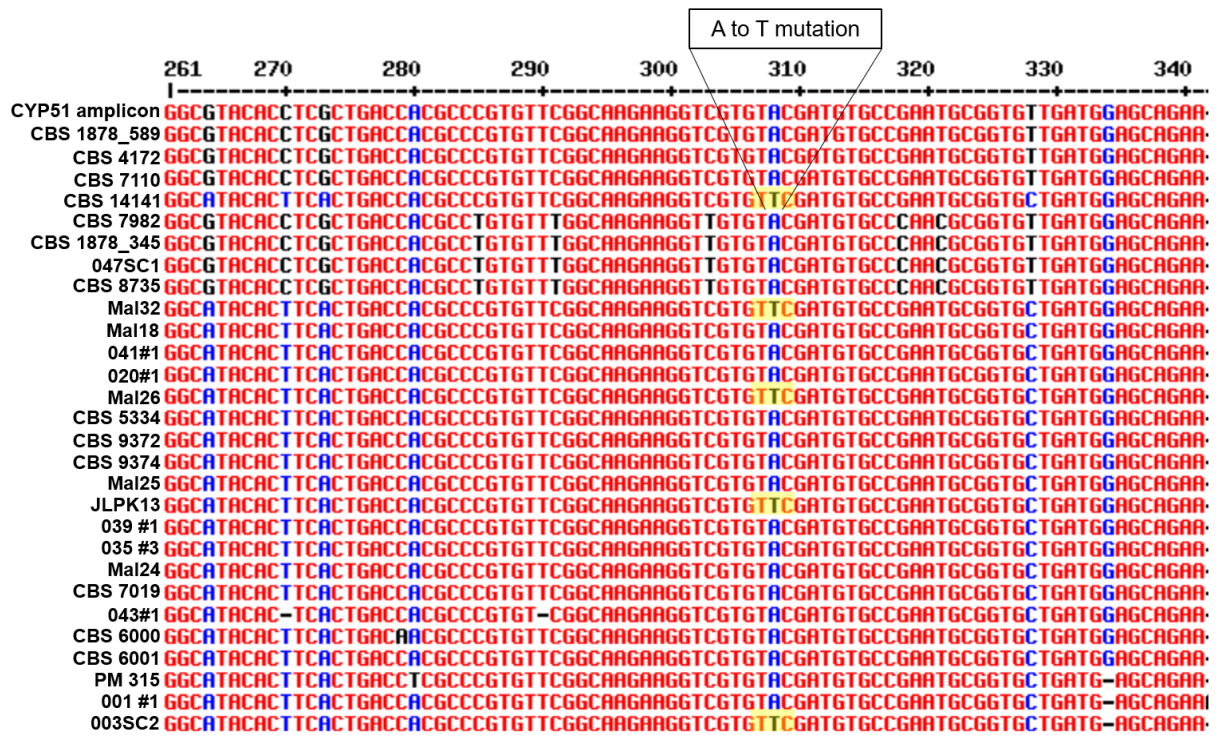

### Supplementary Figure 3.

Validation of *PDR10* gene knockout and gene expression in *M. furfur* strains

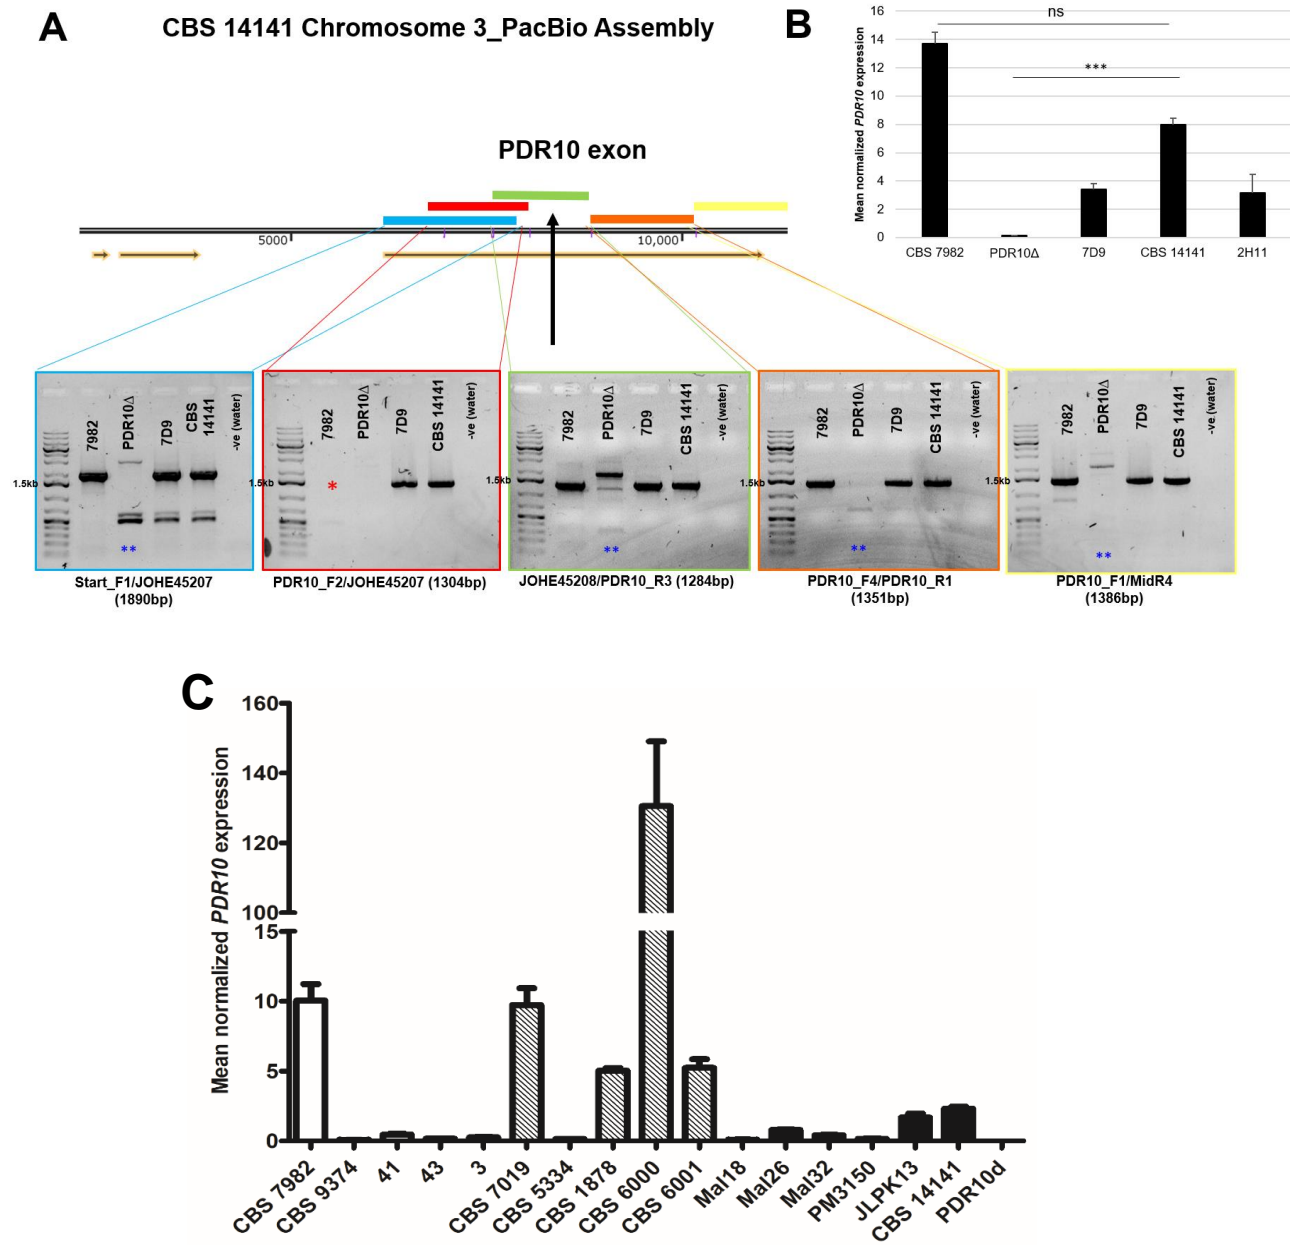

**Supplementary Table 1. MIC values for 26 *M. furfur* isolates**

| Strain                  | Source                  | Minimum Inhibitory Concentrations (MICs)/ µg/ml |                  |                    |                 |                       |                   |                    |                       |
|-------------------------|-------------------------|-------------------------------------------------|------------------|--------------------|-----------------|-----------------------|-------------------|--------------------|-----------------------|
|                         |                         | AMB/(GM)                                        | TRB/(GM)         | CTZ/(GM)           | MCZ/(GM)        | ITZ/(GM)              | FLZ/(GM)          | KTZ/(GM)           | VRZ/(GM)              |
| <b>Disease Isolates</b> |                         |                                                 |                  |                    |                 |                       |                   |                    |                       |
| <b>CBS 14141</b>        | Blood                   | >32                                             | 8-32 (16)        | >256               | >256            | 0.03-0.06<br>(0.04)   | >256              | 0.125              | 4                     |
| <b>CBS6000</b>          | Dandruff                | 1-4<br>(1.74)                                   | 8-16 (10.1)      | 16-128<br>(76.1)   | 256             | 0.06                  | 8                 | 1                  | 0.125                 |
| <b>CBS6001</b>          | Pityriasis versicolor   | 2-4<br>(2.82)                                   | 8-16<br>(11.3)   | 8-16<br>(12.7)     | 16              | 0.06                  | 8                 | 1                  | 0.125                 |
| <b>JLPK13</b>           | Urine                   | 2-16<br>(4.42)                                  | 16->32<br>(26.9) | 256                | 256             | 0.06                  | 64-128<br>(76.1)  | 0.25-0.5           | 1-2<br>(1.59)         |
| <b>CBS5334</b>          | Infected Skin           | 0.25-1<br>(0.44)                                | 16               | 16-128<br>(40.3)   | 64-256<br>(128) | 0.03-0.06<br>(0.047)  | 4-8<br>(6.34)     | 0.25-1<br>(0.40)   | 0.125                 |
| <b>Mal 18</b>           | Blood                   | 1-4 (2)                                         | 4-8<br>(6.35)    | 32-64<br>(50.8)    | 64              | 0.03-0.06<br>(0.038)  | 4                 | 0.25-0.5<br>(0.40) | 0.125                 |
| <b>Mal 24</b>           | Blood                   | 1-4 (2)                                         | 2                | 32                 | 32-64<br>(45.3) | 0.03                  | 4                 | 0.25-1<br>(0.5)    | 0.06-0.125<br>(0.077) |
| <b>Mal 25</b>           | Skin catheter insertion | 1                                               | 4-16<br>(8)      | 64-256<br>(128)    | 256             | 0.03-0.125<br>(0.077) | 4-8<br>(6.35)     | 0.5-1<br>(0.63)    | 0.125                 |
| <b>Mal 26</b>           | Blood                   | 2-16<br>(6.72)                                  | 8-16<br>(12.1)   | >256               | 128->256        | 0.03-0.125<br>(0.078) | 128               | 0.5-2<br>(1)       | 1-4 (1.59)            |
| <b>Mal 32</b>           | Skin catheter insertion | 16                                              | >32              | >256               | 128->256        | 0.125                 | 64-128<br>(101.6) | 0.5-2<br>(1)       | 1-2 (1.59)            |
| <b>PM 315</b>           | Anal Swab of Neonate    | 1-4<br>(2)                                      | 8-32<br>(20.2)   | 128->256           | 128->256        | 0.06                  | 8                 | 0.5-2<br>(0.79)    | 0.25-0.5<br>(0.31)    |
| <b>CBS 1878</b>         | Dandruff                | 1-2<br>(1.41)                                   | 16->32<br>(25.4) | 128-256<br>(203.2) | 64-256 (128)    | 0.06                  | 4                 | 1-4<br>(2)         | 0.125                 |
| <b>CBS 7019</b>         | Pityriasis Versicolor   | 1-4<br>(1.59)                                   | 8-16<br>(10.1)   | 128-256<br>(161.3) | 256             | 0.03                  | 8-16 (10.1)       | 0.5-1<br>(0.63)    | 0.125                 |

GM: Geometric mean of n ≥ 3 replicates – value not indicated if all MIC values are equal across all replicates

AMB: Amphotericin B

CTZ: Clotrimazole

ITZ: Itraconazole

KTZ: Ketoconazole

TRB: Terbinafine

MCZ: Miconazole

FLZ: Fluconazole

VRZ: Voriconazole

| Strain                  | Source                      | Minimum Inhibitory Concentrations (MICs)/ µg/ml |                |               |                 |                   |            |               |                    |
|-------------------------|-----------------------------|-------------------------------------------------|----------------|---------------|-----------------|-------------------|------------|---------------|--------------------|
|                         |                             | AMB/(GM)                                        | TRB/(GM)       | CTZ/(GM)      | MCZ/(GM)        | ITZ/(GM)          | FLZ/(GM)   | KTZ/(GM)      | VRZ/(GM)           |
| <b>Healthy Isolates</b> |                             |                                                 |                |               |                 |                   |            |               |                    |
| <b>CBS 7982</b>         | Healthy Skin, ear           | 1-2 (1.23)                                      | 0.25-0.5 (0.4) | 1-8 (3.17)    | 0.5-4 (1.59)    | 0.03              | 1          | ≤0.03         | 0.03               |
| <b>020#01</b>           | Healthy Skin, nose          | 1-4 (2.52)                                      | 1-2 (1.41)     | 2-4           | 4               | 0.06              | 4          | 0.06          | 0.125              |
| <b>041#01</b>           | Healthy Skin, nose          | 4                                               | 4              | 16            | 16              | 0.06              | 4          | ≤0.03         | 0.125              |
| <b>039#01</b>           | Healthy Skin, nose          | 1-4 (2)                                         | 2-8 (4)        | 8-16(10.1)    | 8->16           | 0.06              | 2          | ≤0.03         | 0.06               |
| <b>035#03</b>           | Healthy Skin, nose          | 2-8 (4)                                         | 2-4 (3.17)     | 8-16 (10.1)   | 8-16 (10.1)     | 0.06-0.25 (0.12)  | 2-4 (2.83) | ≤0.03         | 0.06               |
| <b>CBS 9372</b>         | Back of healthy individual  | 1-4 (2)                                         | 4-8 (4)        | 64            | 128-256 (181.0) | 0.03-0.06 (0.038) | 2          | 0.25          | 0.06               |
| <b>CBS 9374</b>         | Chest of healthy individual | 2                                               | 4-8 (5.66)     | 64-256 (90.5) | 64-256 (128)    | 0.06-0.25 (0.155) | 2-8 (3.17) | 0.25-2 (0.63) | 0.06-0.5 (0.15)    |
| <b>CBS 8735</b>         | Bronchial wash              | 16                                              | 4-16 (8)       | 1             | 1               | ≤0.03             | 2-4 (2.52) | ≤0.03         | 0.06-0.125 (0.077) |
| <b>047 SC1</b>          | Healthy Scalp isolate       | 4                                               | 2              | 0.5           | 2               | 0.125             | 2-4 (2.83) | ≤0.03         | 0.125              |
| <b>003 SC2</b>          | Healthy Scalp isolate       | 4                                               | 2              | 16            | 16-64 (40.3)    | 0.03-0.06 (0.048) | 32         | ≤0.03         | 0.5                |
| <b>CBS 7710</b>         | Skin of man                 | 16                                              | 2              | 4             | 2               | 0.25-0.5 (0.35)   | 8          | ≤0.03         | 0.125-0.25(0.16)   |
| <b>043#01</b>           | Healthy Skin, nose          | 4                                               | 8-16 (11.3)    | 16            | 8-16 (11.3)     | 0.06              | 4          | 0.03          | 0.125              |
| <b>001#01</b>           | Healthy Skin, nose          | 2                                               | 16             | 128           | 64              | 0.125             | 4          | 0.5           | 0.125              |

GM: Geometric mean of n ≥ 3 replicates – value not indicated if all MIC values are equal across all replicates

AMB: Amphotericin B  
TRB: Terbinafine

CTZ: Clotrimazole  
MCZ: Miconazole

ITZ: Itraconazole  
FLZ: Fluconazole

KTZ; Ketoconazole  
VRZ: Voriconazole

**Supplementary Table 3.**

|               | <b>Clotrimazole (µg/ml)<br/>MIC range<sup>1</sup></b> | <b>Mean MIC (µg/ml)</b> |
|---------------|-------------------------------------------------------|-------------------------|
| <b>Week 0</b> | 1-4                                                   | 2                       |
| <b>Week 1</b> | 1-4                                                   | 3                       |
| <b>Week 2</b> | 2-8                                                   | 5                       |
| <b>Week 3</b> | 4-16                                                  | 13.33                   |
| <b>Week 4</b> | 4-32                                                  | 17.33                   |
| <b>Week 5</b> | 2-16                                                  | 11.33                   |
| <b>Week 6</b> | 1-4                                                   | 6                       |

**Supplementary Table 6.**

| <b>Primers<br/>(10 µM)</b>               | <b>Forward (5'-3')/Reverse (5'-3')</b>                                                                                |
|------------------------------------------|-----------------------------------------------------------------------------------------------------------------------|
| CYP51<br>Y67F region                     | CGTGCTTTGGCAGTTGCT/AGAACTTGCTCATCAGGC                                                                                 |
| 7982_F1<br>1.5kb forward<br>flanking arm | <b>GTTTTCCAGTCACGACGTTGTA</b> AAACCGTATATCTCACACAGATCG/<br><b>CGAGGATCTGCACCGTGGA</b> CCGTAGGTCACCGCCGAGC             |
| 7982_F2<br>1.5kb reverse<br>flanking arm | <b>CTGGGTCAGACATAGGAGAGGACG</b> GCGGCGATTCTTTCCACCC/<br><b>CAGCTATGACATGATTACGAATTCTTAATT</b> CAGCGAGTTGTAGAAGAACC    |
| 14141_F1                                 | <b>CTGCAAGGCGATTAAGTTG</b> GGAGGCACATCTATATGGCTTTCC/<br><b>CGAGGATCTGCACCGTGGA</b> ACCGCCGAGCCCACTA                   |
| 14141_F2                                 | <b>CTGGGTCAGACATAGGAGAGGACG</b> AGAAGCCTAGTGTTGTGGTCTAC<br><b>/CAGCTATGACATGATTACGAATTCTTAATT</b> GGCTGTAGTTGTGTGCCCA |
| ITS primer<br>(5F4R)                     | TCCGTAGGTGAACCTGCGG/ TCCTCCGCTTATTGATATGC                                                                             |
| Actin                                    | CCCGCTGAACCCSAAGGC/ CACACCGTCACCCGAGTC                                                                                |
| PDR10                                    | ATGTTCTTGCGTACTACCG/ GACAGCACGAGCGACATAAA                                                                             |

<sup>1</sup> Values represent a range observed over triplicate AFST assays performed at each time point
